# Supplementary material for: Oestrogen receptor β regulates epigenetic patterns at specific genomic loci through interaction with thymine DNA glycosylase
Source: PubMed Central journal article supplement (PMC4756533; doi:10.1186/s13072-016-0055-7), 2016-02-16

**A**

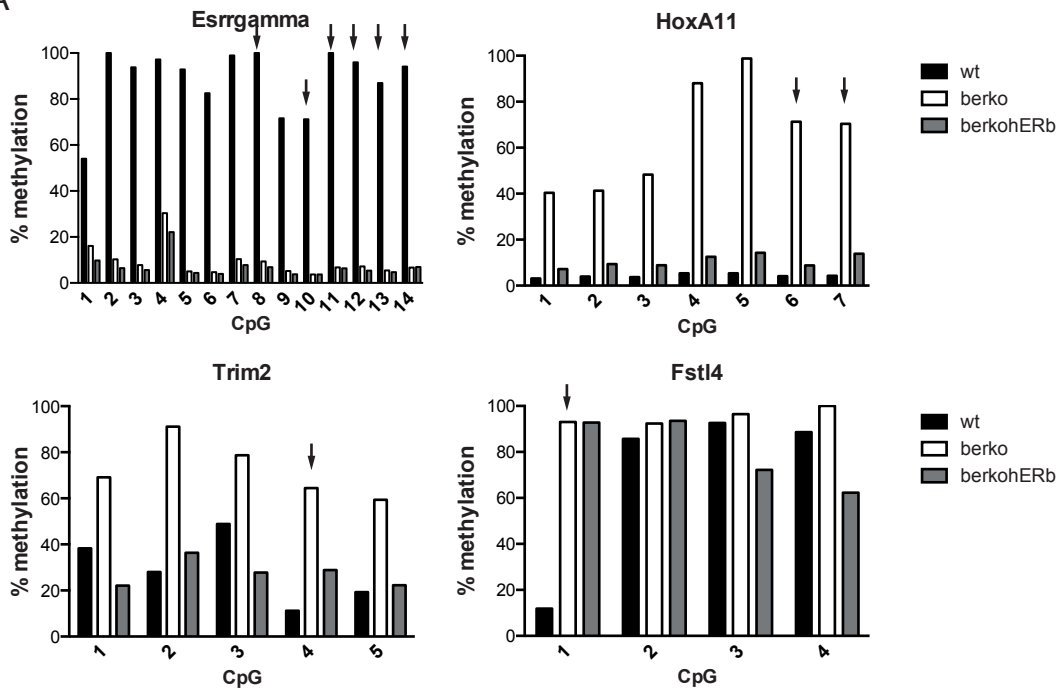

**B**

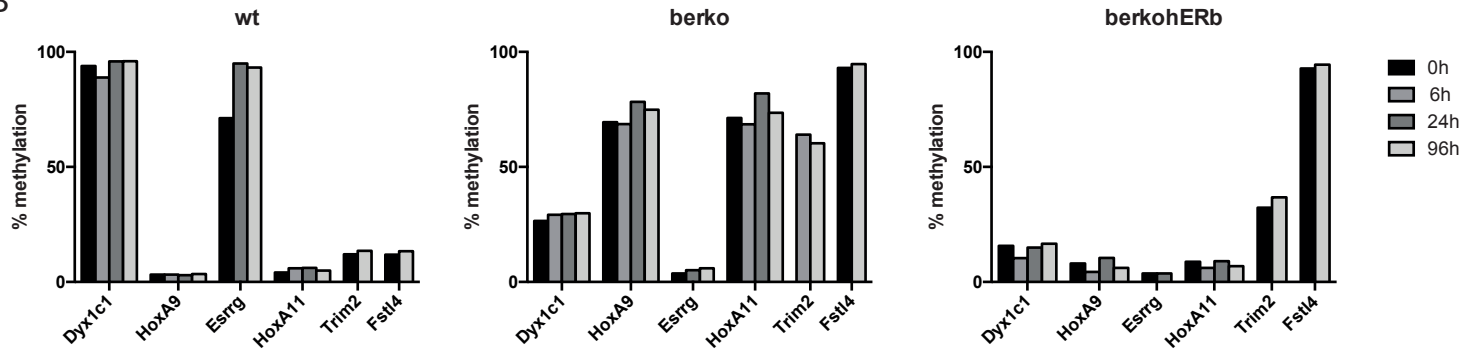

**C**

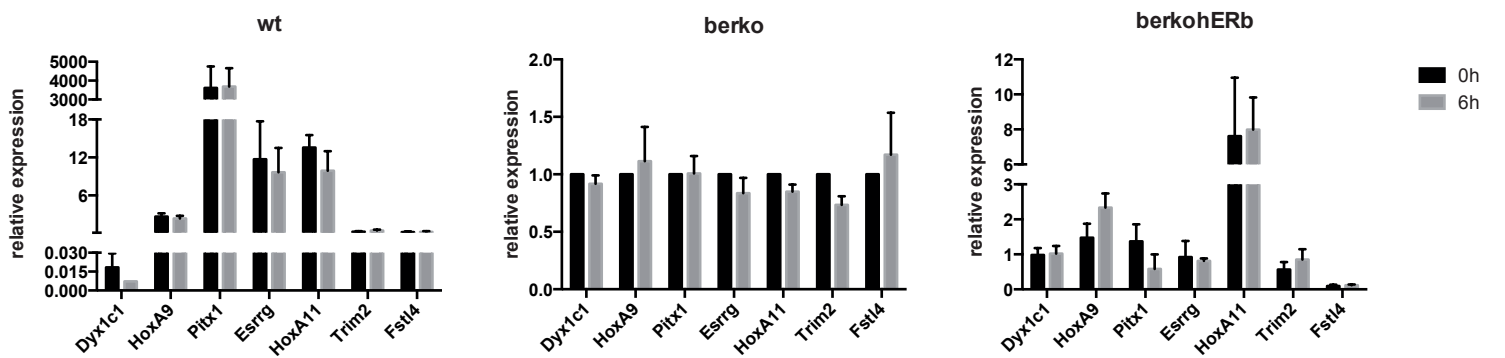

Supplement: 13072_2016_55_MOESM1_ESM.pdf [file 13072_2016_55_MOESM1_ESM.pdf]
