# Supplementary material for: Oestrogen receptor β regulates epigenetic patterns at specific genomic loci through interaction with thymine DNA glycosylase
Source: PubMed Central journal article supplement (PMC4756533; doi:10.1186/s13072-016-0055-7), 2016-02-16
Supplement: 13072_2016_55_MOESM8_ESM.pdf [file 13072_2016_55_MOESM8_ESM.pdf]

**Primers used for real-time PCR and Pyrosequencing.** MSD: methylation sensitive restriction enzyme digest, pyro: pyrosequencing.

| Target                       | PCR primers                                                                                                                      | Sequencing primer                                | Method       |
|------------------------------|----------------------------------------------------------------------------------------------------------------------------------|--------------------------------------------------|--------------|
| Hypo1                        | for: TACCTAGCGGGTGGACATTC<br>rev: TCCGGGTCTGCAGTAGAGTC                                                                           |                                                  | MSD          |
| Hypo2<br>( <i>Dyx1c1</i> )   | for: GGCTTCCTAGCGACGTAAAG<br>rev: TTTCCCCACAGAATACGTCAG                                                                          |                                                  | MSD,<br>ChIP |
| Hypo3                        | for: AGAGCTGCAAGGCAGATGAT<br>rev: TTTGCCTCCAAGAATCCAT                                                                            |                                                  | MSD          |
| Hypo4                        | for: TTCATGGGGAATTAACGCATA<br>rev: AAGGATGACGCACACTCTTTC                                                                         |                                                  | MSD          |
| Hypo5                        | for: CTCTGAGTGTGTTGTCCCTGTG<br>rev: CTACTCCAATTCCAGGGCAT                                                                         |                                                  | MSD          |
| Hypo6                        | for: TGTGTTCCGTACCACCATTG<br>rev: GGTCTACCCGCACTTTTTCA                                                                           |                                                  | MSD          |
| Hypo7                        | for: GAGCCCAGAGCCCATACTC<br>rev: ACCCTTTAAGGCAGGGATA                                                                             |                                                  | MSD          |
| Hypo8<br>( <i>HoxD9</i> )    | for: CCCAGTTTAGCGGACTGATT<br>rev: CTGCAGCCACCATTG                                                                                |                                                  | MSD,<br>ChIP |
| Hypo9                        | for: AAAACTTCGGCCAACATGAG<br>rev: TGAGCCTGCAGTTCTCTGTG                                                                           |                                                  | MSD          |
| Hypo10                       | for: GCCCTCAATCGCAGACACTA<br>rev: GTTTTAACTGCCAGCCATGC                                                                           |                                                  | MSD          |
| Hyper1<br>( <i>HoxA9</i> )   | for: GTGAGTGTCAAGCGTGGGACAGTCA<br>rev: CTCTCCTTCGCGGGCTTAC                                                                       |                                                  | MSD,<br>ChIP |
| Hyper2<br>( <i>HoxA10</i> )  | for: AGCTCGCTAGTCCCTTTTCT<br>rev: GTCGAGCCAGAGGCCAGT                                                                             |                                                  | MSD,<br>ChIP |
| Hyper3                       | for: ACTGGCCTCTGGCTCGAC<br>rev: CACCACCCACTCTGGTTTG                                                                              |                                                  | MSD          |
| Hyper4<br>( <i>Tnfrif2</i> ) | for: GCCCCCAACACTGGACTC<br>rev: GGGCCCTCCTAAAATAGTCG                                                                             |                                                  | MSD,<br>ChIP |
| Hyper5                       | for: TGCTGTCTGTCATTTGCTCTG<br>rev: CTCCAGGCCTCTGAGGAAG                                                                           |                                                  | MSD          |
| Hyper6<br>( <i>Pitx1</i> )   | for: TTGTCTGCAGCAGGTAGGAA<br>rev: CTGGATGGAGGGAGGGAAAG                                                                           |                                                  | MSD,<br>ChIP |
| Hyper7                       | for: CTATTCCAGTCGGAGCCATC<br>rev: GGAATGGGCCTGAGAAACA                                                                            |                                                  | MSD          |
| Hyper8                       | for: GACCGTCCCTGCAGAGTTAT<br>rev: CGGGGCTGCAGTTAATAAAG                                                                           |                                                  | MSD          |
| <i>Dyx1c1</i>                | for:<br>TTGTAATATTTAATATAGTGGGAGAT<br>for_nest: AGGGTAGGAAGTGATGGTAATT<br>rev:<br>AAAAAATTAACCTTCAAATAACTTTCC<br>(biot)          | Seq1: GGAAGTGATGGTAATTT<br>Seq2: AGTGGTTGTGTAGTT | Pyro         |
| <i>HoxA9</i>                 | for:<br>TAGTTAGGATAAAGTGTGAGTGTTAA<br>G<br>for_nested:<br>GTGAGTGTTAAGAGTGGGATAGTTAT<br>rev: ACTACAATATATCATCACCACCACC<br>(biot) | GTTAATGTTATAAGGT                                 | Pyro         |
| <i>Pitx1</i>                 | for: TGTGTTGTTTGTGAAGTGAGTG<br>rev: ATCCCAAACCCCTAAATAAAA<br>(biot)                                                              | TTTGTGTTGTAGTAGGTAGGAA<br>TG                     | Pyro         |
| <i>Esrrg</i>                 | for:<br>TATTAAGAAAATAGGGAAGGTATTATG<br>A                                                                                         | GGAAGGTATTATGAAGTTTT<br>GGGTTATAGG               | Pyro         |

|                                 |                                                                                                                                 |                                  |          |
|---------------------------------|---------------------------------------------------------------------------------------------------------------------------------|----------------------------------|----------|
|                                 | rev: CCTCCTTAAACTAAACTCCC (biot)                                                                                                |                                  |          |
| <i>HoxA11</i>                   | for: AGAAGGGGTTTTAAGTAGT<br>rev: CCACCCACCTTATCCTCAA (biot)                                                                     | GGAGGAGAAGGAGAGA                 | Pyro     |
| <i>Trim2</i>                    | for: TATAGTAGATTTTTTAAAAGGGGGT<br>rev: CTCAAACCTACCAAAAAACCTTATA<br>rev_nest:<br>AAAAAAAACAACATAAAACTAAACC<br>(biot)            | GTTGTGAATAGAGGTATTGG<br>ATAAGTGA | Pyro     |
| <i>Fstl4</i>                    | for: GTGAAGTTAGAGGGGATAATAGTGA<br>for_nested:<br>GGGTTTTTTTGTGTTTGTAGGTTTAG<br>rev:<br>TTTCCTAAACAAATTAATCCCTTAATAT<br>C (biot) | AGGTTTAGATATTTTTTTTAT            | Pyro     |
| <i>Dyx1c1</i>                   | for: TGC GCGATGCTGACGTATT<br>rev: AGAAAGGCTATCCCACAGAACT                                                                        |                                  | RT-qPCR  |
| <i>HoxD9</i>                    | for: GCCACTACGGGATTAAGCCTG<br>REV: GCGGAGCACTCAGTCCTTT                                                                          |                                  | RT-qPCR  |
| <i>HoxA9</i>                    | for: GGCCTTATGGCATTAAACCTGA<br>rev: ACAAAGTGTGAGTGTCAAGCG                                                                       |                                  | RT-qPCR  |
| <i>HoxA10</i>                   | for: GGAAGCATGGACATTCAGGT<br>rev: CCAGGCAAGCAAGACCTTAG                                                                          |                                  | RT-qPCR  |
| <i>Tnfrif2</i>                  | for: AGGAGGAGTCTGCGAAGAAGA<br>rev: GGCAGTGGACCATCTAACTCG                                                                        |                                  | RT-qPCR  |
| <i>Pitx1</i>                    | for: ATCGTCCGACGCTGATCTG<br>rev: GCTTGTGAAGTGAGTGCGTT                                                                           |                                  | RT-qPCR  |
| <i><math>\beta</math>-actin</i> | for: CGTCGACAACGGCTCCGGCATG<br>rev: CCACCATCACACCCTGGTGCCTAGG                                                                   |                                  | RT-qPCRs |
