# Supplementary material for: Oestrogen receptor β regulates epigenetic patterns at specific genomic loci through interaction with thymine DNA glycosylase
Source: PubMed Central journal article supplement (PMC4756533; doi:10.1186/s13072-016-0055-7), 2016-02-16
Supplement: 13072_2016_55_MOESM9_ESM.pdf [file 13072_2016_55_MOESM9_ESM.pdf]

### Antibodies used for western blotting and ChIP

| Name                         | Company/Reference      | Method            |
|------------------------------|------------------------|-------------------|
| $\alpha$ -TDG 141 Salasso    | P. Schär <sup>1</sup>  | Western blot/ChIP |
| $\alpha$ -ER $\beta$ LBD IgG | M. Warner <sup>2</sup> | Western blot/ChIP |
| $\alpha$ -GST                | GE Healthcare          | Western blot      |
| $\alpha$ -Hsp90 F-8          | Santa Cruz             | Western blot      |

1. Hardeland U, Steinacher R, Jiricny J, Schar P. Modification of the human thymine-DNA glycosylase by ubiquitin-like proteins facilitates enzymatic turnover. *The EMBO journal* 2002; 21:1456-64.
2. Saji S, Jensen EV, Nilsson S, Rylander T, Warner M, Gustafsson JA. Estrogen receptors alpha and beta in the rodent mammary gland. *Proceedings of the National Academy of Sciences of the United States of America* 2000; 97:337-42.
